# Supplementary material for: Endoplasmic Reticulum Stress Signaling as a Therapeutic Target in Malignant Pleural Mesothelioma
Source: MDPI journal article supplement (doi:10.3390/cancers11101502), 2019-10-08
Supplement: s1 [file s1]

# Supplementary Materials: Endoplasmic reticulum stress signaling as a therapeutic target in malignant pleural mesothelioma

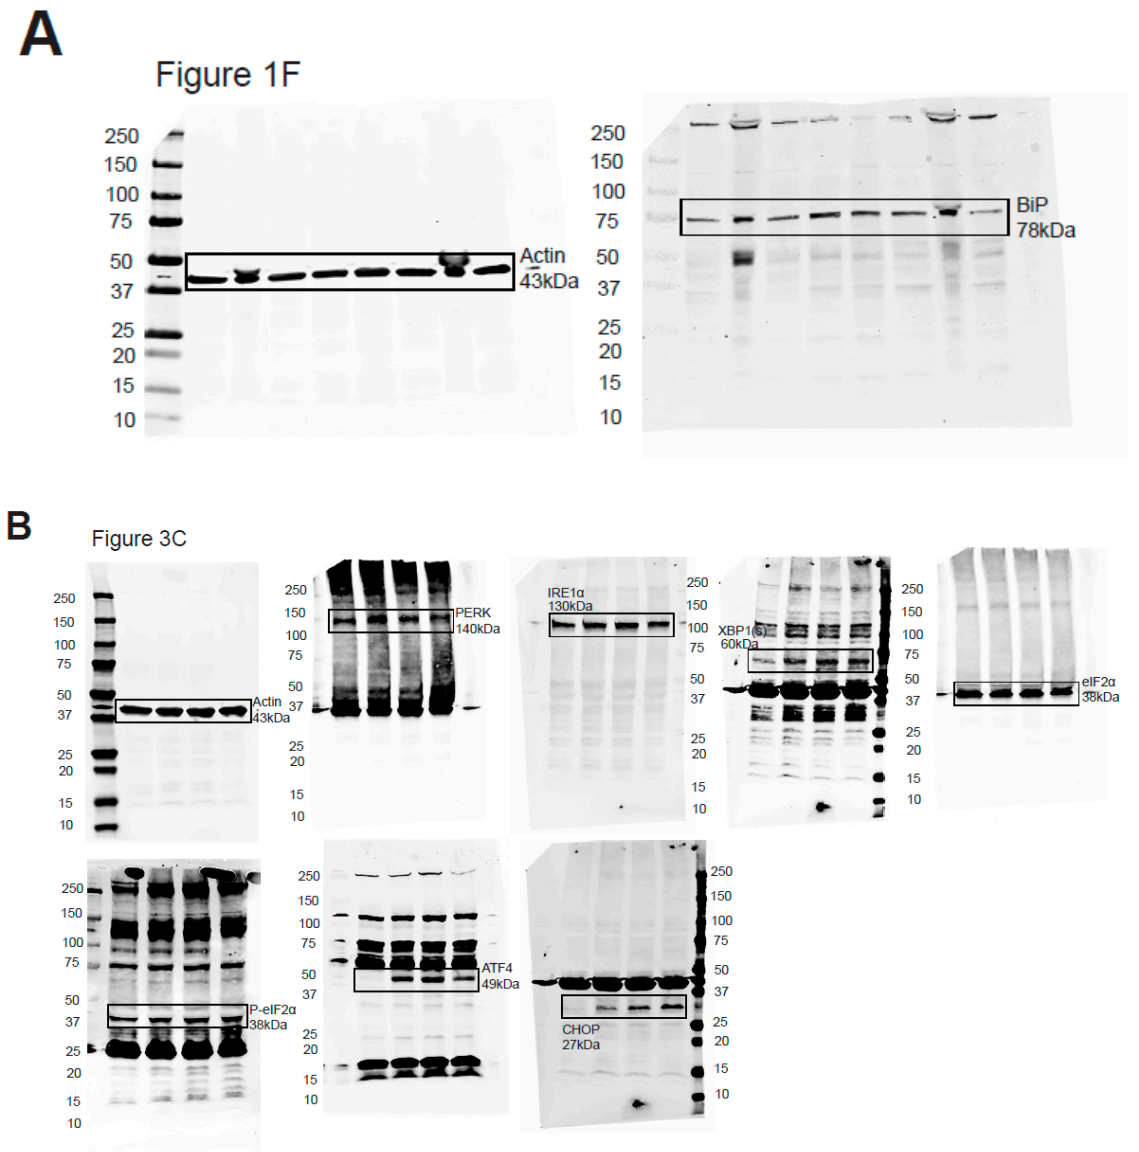

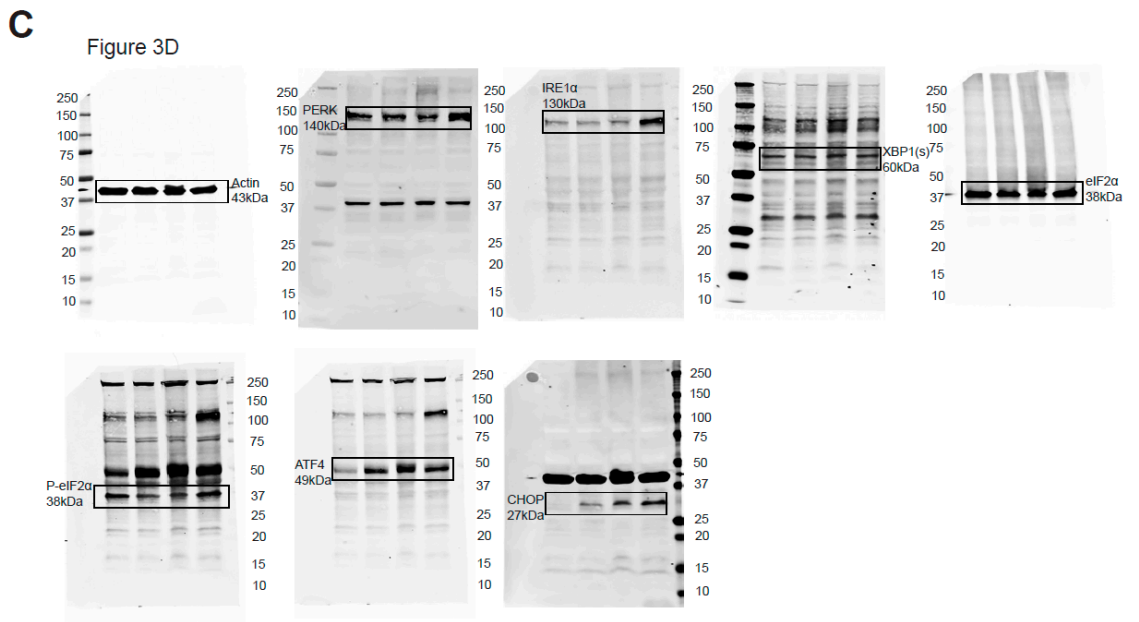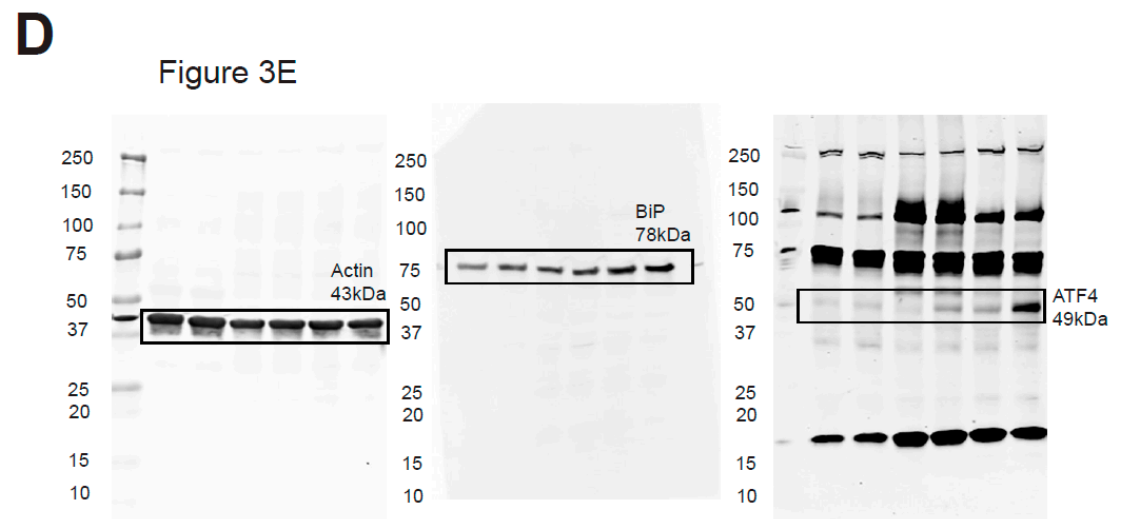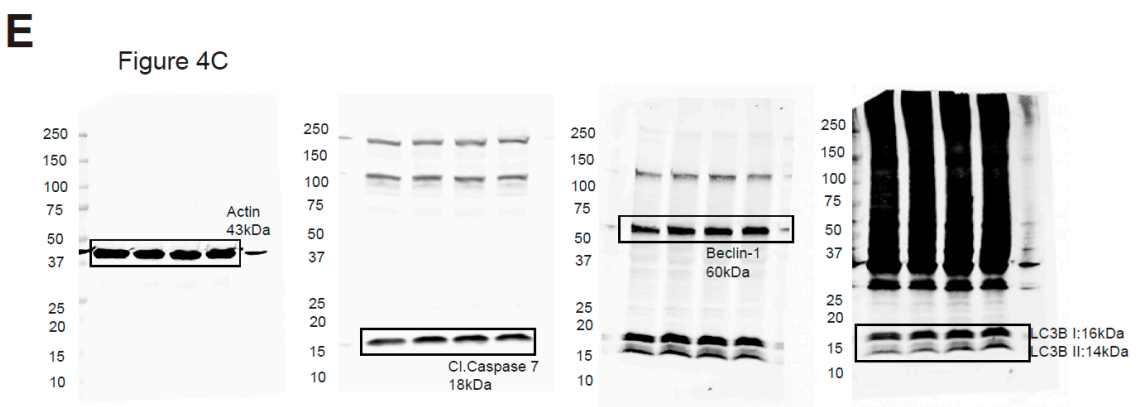

F

Figure 4G

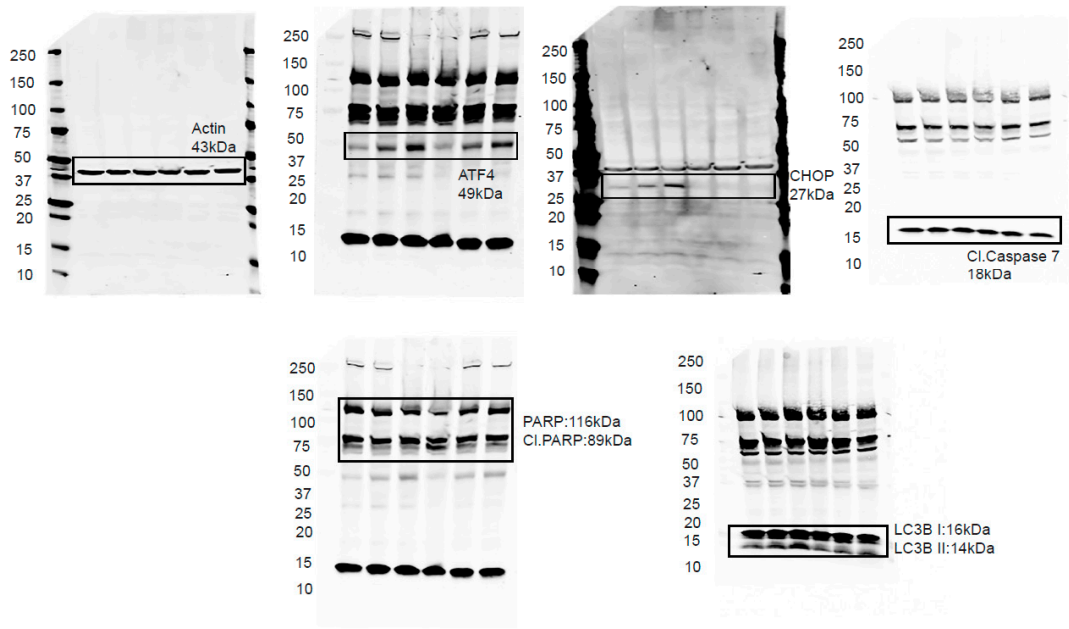

G

Figure 5G

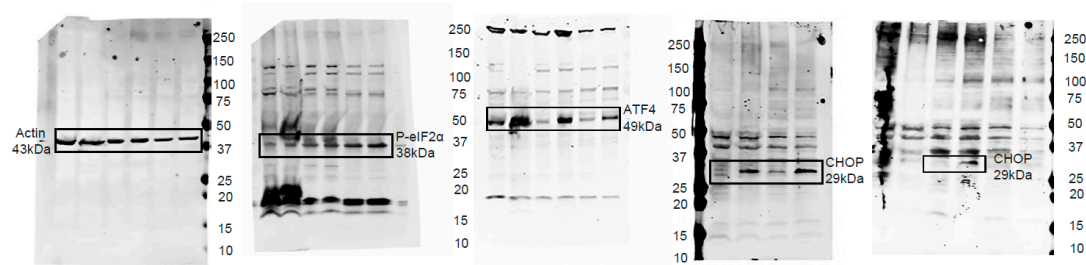

**H****Figure 6G**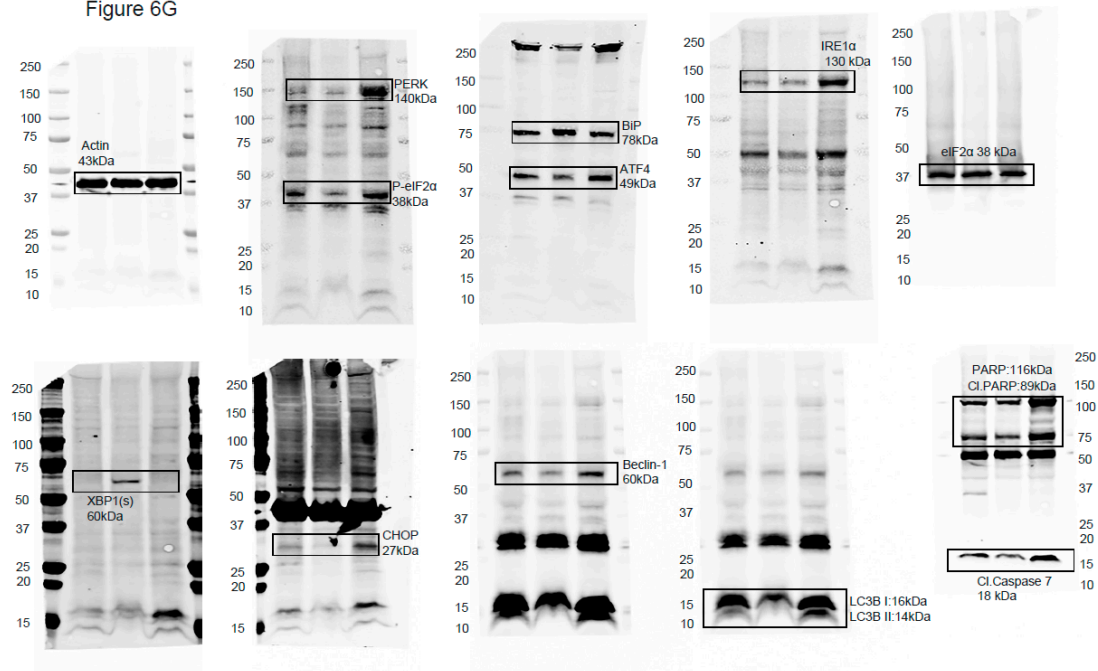

**Figure S1 (A-H).** Uncropped blots from Figure 1F, 3C-E, 4C, G, 5G and 6G. Numbers next to the blot indicate molecular weight (kDa) of the marker.
